# Supplementary material for: Fabrication of zinc–histidine-functionalized graphene quantum dot framework amphiphilic nanoparticles and application in the synthesis of polystyrene microspheres for adsorption of Cu2+ by Pickering emulsion polymerization
Source: Royal Society of Chemistry journal article supplement (doi:10.1039/c6ra23366j), 2016-01-01
Supplement: c6ra23366j1.pdf [file c6ra23366j1.pdf]

## Support materials:

### Fabrication of zinc-histidine-functionalized graphene quantum dot framework amphiphilic nanoparticles and the application in the synthesis of polystyrene microspheres for adsorption of $\text{Cu}^{2+}$ by Pickering emulsion polymerization

Li Ruiyi,<sup>a</sup> Chen Jun,<sup>a</sup> Zhou Xiaoyan<sup>a</sup> Li Zaijun<sup>\*,a,b</sup> and Liu Junkang<sup>a</sup>

<sup>a</sup> School of Chemical and Material Engineering, Jiangnan University, Wuxi, China

<sup>b</sup> Key Laboratory of Food Colloids and Biotechnology, Ministry of Education, Wuxi 214122, China

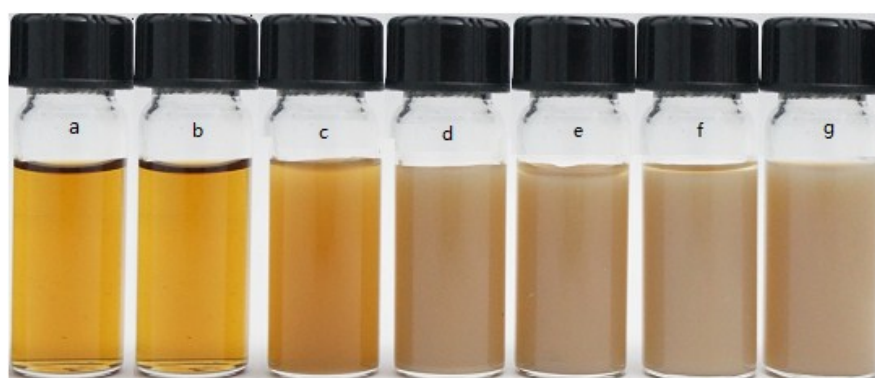

Fig. s1 The optical photographs (under) of His-GQD system after added 0.0 (a), 0.01 (b), 0.02 (c), 0.03 (d), 0.04 (d), 0.05 (e), 0.06 (f) and 0.07 (g) of  $\text{Zn}^{2+}$

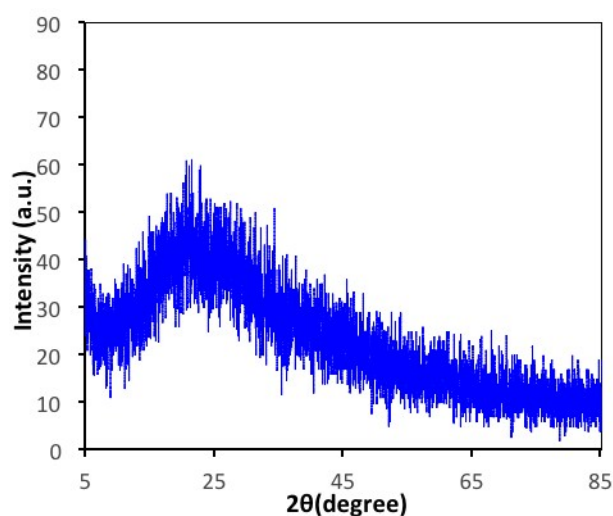

Fig. s2 XRD pattern of Zn-His-GQD framework nanoparticles

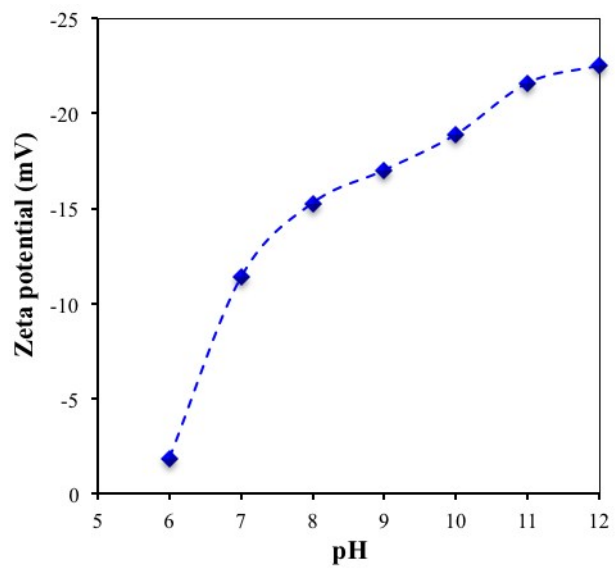

Fig. s3 The relationship of Zeta potentials of the Zn-His-GQD framework nanoparticles at different pH
